# Supplementary material for: QFT-Plus: a plus in variability? – Evaluation of new generation IGRA in serial testing of students with a migration background in Germany
Source: PubMed Central journal article supplement (PMC5216544; doi:10.1186/s12995-016-0148-z), 2017-01-05
Supplement: 12995_2016_148_MOESM1_ESM.pdf [file 12995_2016_148_MOESM1_ESM.pdf]

**Additional table 1** Overview with exact IFN- $\gamma$  values for all subjects at each visit and overall consistency.

| Subject info |     |     | Visit 1     |                  | Visit 2     |                  | Visit 3     |                  | Visit 4     |                  | Overall trend       |                      |
|--------------|-----|-----|-------------|------------------|-------------|------------------|-------------|------------------|-------------|------------------|---------------------|----------------------|
| No.          | Sex | Age | QFT-GIT     | QFT-Plus TB1/TB2 | QFT-GIT     | QFT-Plus TB1/TB2 | QFT-GIT     | QFT-Plus TB1/TB2 | QFT-GIT     | QFT-Plus TB1/TB2 | Consistency QFT-GIT | Consistency QFT-Plus |
| 1            | F   | 25  | pos. (>10)  | pos. (>10/>10)   | pos. (>10)  | pos. (>10/>10)   | pos. (>10)  | pos. (>10/>10)   | pos. (>10)  | pos. (>10/>10)   | Positive            | Positive             |
| 2            | M   | 25  | pos. (7.22) | pos. (4.00/5.07) | pos. (7.01) | pos. (5.80/6.01) | pos. (7.34) | pos. (6.14/6.46) | pos. (5.85) | pos. (8.01/7.19) | Positive            | Positive             |
| 3            | M   | 28  | pos. (6.20) | pos. (2.55/2.82) | pos. (3.83) | pos. (2.67/2.17) | pos. (5.73) | pos. (1.65/2.93) | pos. (4.24) | pos. (1.49/2.45) | Positive            | Positive             |
| 4            | M   | 34  | pos. (4.41) | pos. (4.24/5.19) | pos. (7.34) | pos. (6.51/6.64) | pos. (3.85) | pos. (4.66/5.63) | pos. (2.77) | pos. (3.21/3.81) | Positive            | Positive             |
| 5            | M   | 26  | pos. (1.38) | pos. (0.75/1.49) | pos. (0.92) | pos. (1.08/1.71) | pos. (1.41) | pos. (1.29/2.06) | pos. (2.20) | pos. (1.85/2.46) | Positive            | Positive             |
| 6            | F   | 26  | pos. (1.30) | pos. (2.47/2.17) | pos. (5.53) | pos. (1.50/1.70) | pos. (6.26) | pos. (1.73/3.10) | pos. (3.91) | pos. (3.73/4.05) | Positive            | Positive             |
| 7            | F   | 26  | pos. (0.81) | pos. (0.85/0.82) | pos. (1.44) | pos. (0.66/0.41) | pos. (1.41) | pos. (0.45/0.61) | pos. (1.05) | pos. (0.65/0.87) | Positive            | Positive             |
| 8            | M   | 36  | pos. (0.71) | pos. (0.75/0.77) | pos. (1.05) | pos. (1.25/1.23) | pos. (0.88) | pos. (0.99/1.18) | pos. (0.62) | pos. (1.08/0.70) | Positive            | Positive             |
| 9            | M   | 32  | pos. (0.40) | neg. (0.15/0.19) | pos. (0.62) | neg. (0.17/0.14) | pos. (0.66) | neg. (0.14/0.09) | pos. (0.65) | pos. (0.34/0.40) | Positive            | Inconsistent         |
| 10           | M   | 20  | pos. (0.35) | neg. (0.24/0.20) | neg. (0.31) | pos. (0.50/0.47) | pos. (0.46) | pos. (0.55/0.73) | pos. (0.53) | pos. (0.79/0.69) | Inconsistent        | Inconsistent         |
| 11           | M   | 23  | neg. (0.18) | pos. (0.32/0.64) | pos. (0.52) | neg. (0.11/0.12) | pos. (0.47) | pos. (0.46/0.40) | pos. (0.63) | pos. (0.56/0.61) | Inconsistent        | Inconsistent         |
| 12           | M   | 25  | neg. (0.04) | neg. (0.08/0.08) | neg. (0.09) | neg. (0.05/0.14) | neg. (0.09) | pos. (0.16/0.36) | neg. (0.14) | neg. (0.21/0.24) | Negative            | Inconsistent         |
| 13           | F   | 23  | neg. (0.02) | neg. (0.09/0.00) | neg. (0.26) | neg. (0.11/0.05) | neg. (0.18) | neg. (0.08/0.05) | neg. (0.18) | neg. (0.05/0.04) | Negative            | Negative             |
| 14           | M   | 25  | neg. (0.11) | neg. (0.05/0.11) | neg. (0.06) | neg. (0.07/0.07) | missing     | missing          | neg. (0.06) | neg. (0.12/0.06) | Negative            | Negative             |
| 15           | M   | 23  | neg. (0.02) | neg. (0.00/0.00) | neg. (0.03) | neg. (0.00/0.00) | neg. (0.09) | neg. (0.00/0.00) | neg. (0.00) | neg. (0.00/0.00) | Negative            | Negative             |
| 16           | F   | 26  | neg. (0.07) | neg. (0.04/0.03) | neg. (0.02) | neg. (0.00/0.00) | neg. (0.00) | neg. (0.00/0.00) | neg. (0.03) | neg. (0.03/0.04) | Negative            | Negative             |
| 17           | F   | 24  | neg. (0.07) | neg. (0.00/0.00) | neg. (0.02) | neg. (0.00/0.00) | neg. (0.00) | neg. (0.00/0.00) | neg. (0.03) | neg. (0.00/0.00) | Negative            | Negative             |
| 18           | F   | 25  | neg. (0.04) | neg. (0.07/0.00) | neg. (0.00) | neg. (0.00/0.00) | neg. (0.00) | neg. (0.00/0.00) | neg. (0.01) | neg. (0.06/0.01) | Negative            | Negative             |
| 19           | M   | 26  | neg. (0.02) | neg. (0.00/0.00) | neg. (0.00) | neg. (0.00/0.00) | neg. (0.03) | neg. (0.01/0.00) | neg. (0.06) | neg. (0.00/0.00) | Negative            | Negative             |
| 20           | M   | 25  | neg. (0.00) | neg. (0.00/0.00) | neg. (0.02) | neg. (0.03/0.00) | neg. (0.00) | neg. (0.00/0.00) | neg. (0.03) | neg. (0.06/0.01) | Negative            | Negative             |
| 21           | F   | 30  | neg. (0.05) | neg. (0.00/0.01) | neg. (0.03) | neg. (0.00/0.00) | neg. (0.03) | neg. (0.00/0.01) | neg. (0.00) | neg. (0.00/0.00) | Negative            | Negative             |
| 22           | M   | 27  | neg. (0.00) | neg. (0.00/0.00) | neg. (0.03) | neg. (0.00/0.01) | neg. (0.00) | neg. (0.00/0.05) | neg. (0.00) | neg. (0.00/0.00) | Negative            | Negative             |
| 23           | F   | 21  | neg. (0.00) | neg. (0.04/0.01) | neg. (0.00) | neg. (0.02/0.01) | neg. (0.01) | neg. (0.01/0.01) | neg. (0.01) | neg. (0.01/0.03) | Negative            | Negative             |
| 24           | M   | 25  | neg. (0.00) | neg. (0.01/0.01) | neg. (0.00) | neg. (0.02/0.00) | neg. (0.00) | neg. (0.04/0.04) | neg. (0.01) | neg. (0.00/0.00) | Negative            | Negative             |
| 25           | F   | 22  | neg. (0.00) | neg. (0.00/0.04) | neg. (0.00) | neg. (0.01/0.00) | neg. (0.00) | neg. (0.00/0.00) | neg. (0.00) | neg. (0.00/0.00) | Negative            | Negative             |
| 26           | F   | 31  | neg. (0.01) | neg. (0.02/0.02) | neg. (0.01) | neg. (0.00/0.04) | neg. (0.00) | neg. (0.00/0.01) | neg. (0.00) | neg. (0.01/0.03) | Negative            | Negative             |
| 27           | F   | 24  | neg. (0.02) | neg. (0.00/0.01) | neg. (0.01) | neg. (0.01/0.01) | neg. (0.03) | neg. (0.01/0.01) | neg. (0.01) | neg. (0.00/0.01) | Negative            | Negative             |
| 28           | F   | 22  | neg. (0.00) | neg. (0.00/0.00) | neg. (0.01) | neg. (0.00/0.01) | neg. (0.00) | neg. (0.00/0.01) | neg. (0.00) | neg. (0.01/0.03) | Negative            | Negative             |
| 29           | F   | 25  | neg. (0.00) | neg. (0.02/0.02) | neg. (0.00) | neg. (0.00/0.02) | neg. (0.01) | neg. (0.02/0.02) | neg. (0.00) | neg. (0.01/0.00) | Negative            | Negative             |
| 30           | F   | 24  | neg. (0.02) | neg. (0.00/0.01) | neg. (0.01) | neg. (0.01/0.01) | neg. (0.00) | neg. (0.01/0.01) | neg. (0.01) | neg. (0.00/0.00) | Negative            | Negative             |
| 31           | M   | 23  | neg. (0.00) | neg. (0.00/0.00) | neg. (0.01) | neg. (0.01/0.01) | neg. (0.02) | neg. (0.00/0.00) | neg. (0.02) | neg. (0.00/0.00) | Negative            | Negative             |
| 32           | F   | 24  | neg. (0.00) | neg. (0.00/0.00) | neg. (0.00) | neg. (0.00/0.00) | neg. (0.00) | neg. (0.00/0.02) | neg. (0.00) | neg. (0.01/0.01) | Negative            | Negative             |
| 33           | F   | 24  | neg. (0.00) | neg. (0.00/0.00) | neg. (0.00) | neg. (0.00/0.00) | neg. (0.00) | neg. (0.00/0.00) | neg. (0.01) | neg. (0.01/0.02) | Negative            | Negative             |
| 34           | M   | 27  | neg. (0.00) | neg. (0.01/0.00) | neg. (0.01) | neg. (0.00/0.00) | neg. (0.00) | neg. (0.01/0.00) | neg. (0.00) | neg. (0.00/0.00) | Negative            | Negative             |
| 35           | M   | 24  | neg. (0.00) | neg. (0.00/0.00) | neg. (0.01) | neg. (0.01/0.01) | neg. (0.01) | neg. (0.01/0.01) | neg. (0.01) | neg. (0.00/0.00) | Negative            | Negative             |
| 36           | F   | 27  | neg. (0.00) | neg. (0.01/0.00) | neg. (0.01) | neg. (0.00/0.01) | neg. (0.01) | neg. (0.00/0.00) | neg. (0.01) | neg. (0.01/0.00) | Negative            | Negative             |
| 37           | F   | 23  | neg. (0.00) | neg. (0.01/0.00) | neg. (0.01) | neg. (0.01/0.01) | neg. (0.00) | neg. (0.00/0.00) | neg. (0.00) | neg. (0.00/0.00) | Negative            | Negative             |
| 38           | F   | 33  | neg. (0.00) | neg. (0.01/0.01) | neg. (0.00) | neg. (0.00/0.00) | neg. (0.00) | neg. (0.01/0.01) | neg. (0.00) | neg. (0.00/0.00) | Negative            | Negative             |
| 39           | F   | 22  | neg. (0.00) | neg. (0.00/0.00) | neg. (0.01) | neg. (0.00/0.00) | neg. (0.01) | neg. (0.00/0.00) | neg. (0.00) | neg. (0.00/0.00) | Negative            | Negative             |
| 40           | M   | 20  | neg. (0.00) | neg. (0.01/0.00) | neg. (0.00) | neg. (0.00/0.00) | neg. (0.00) | neg. (0.00/0.00) | neg. (0.00) | neg. (0.00/0.00) | Negative            | Negative             |
| 41           | F   | 25  | neg. (0.00) | neg. (0.00/0.00) | neg. (0.01) | neg. (0.00/0.00) | neg. (0.00) | neg. (0.00/0.00) | neg. (0.00) | neg. (0.00/0.00) | Negative            | Negative             |
